# Supplementary material
Source: PubMed Central journal article supplement (PMC3147665)
Supplement: supp_193_16_4075__1.pdf [file supp_193_16_4075__1.pdf]

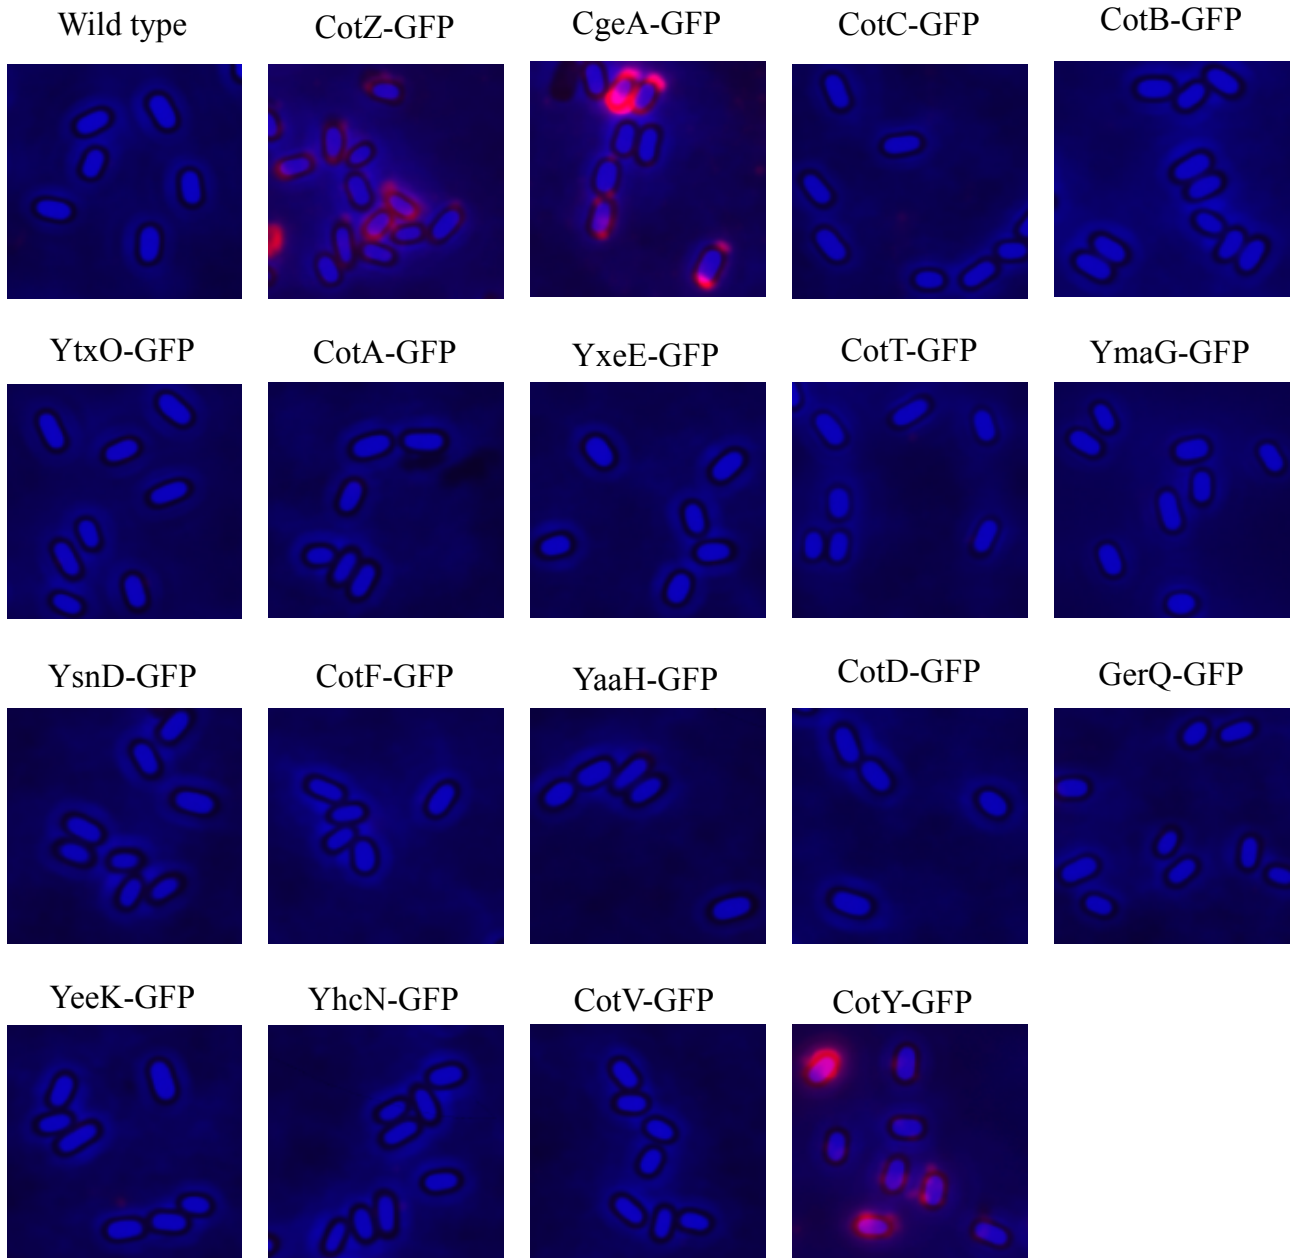

Fig. S1. Immunofluorescence microscopic analysis of *B. subtilis* spores using anti-GFP antibodies. Strains expressing the indicated GFP fusion proteins were induced to sporulate by nutrient exhaustion and subjected to immunofluorescence microscopy using anti-GFP antibodies. Merged images of phase-contrast and immunofluorescent images are shown. Phase-contrast (PC) and immunofluorescence (Anti-GFP) images were captured using exposure times of 1 s and 0.2 s, respectively.

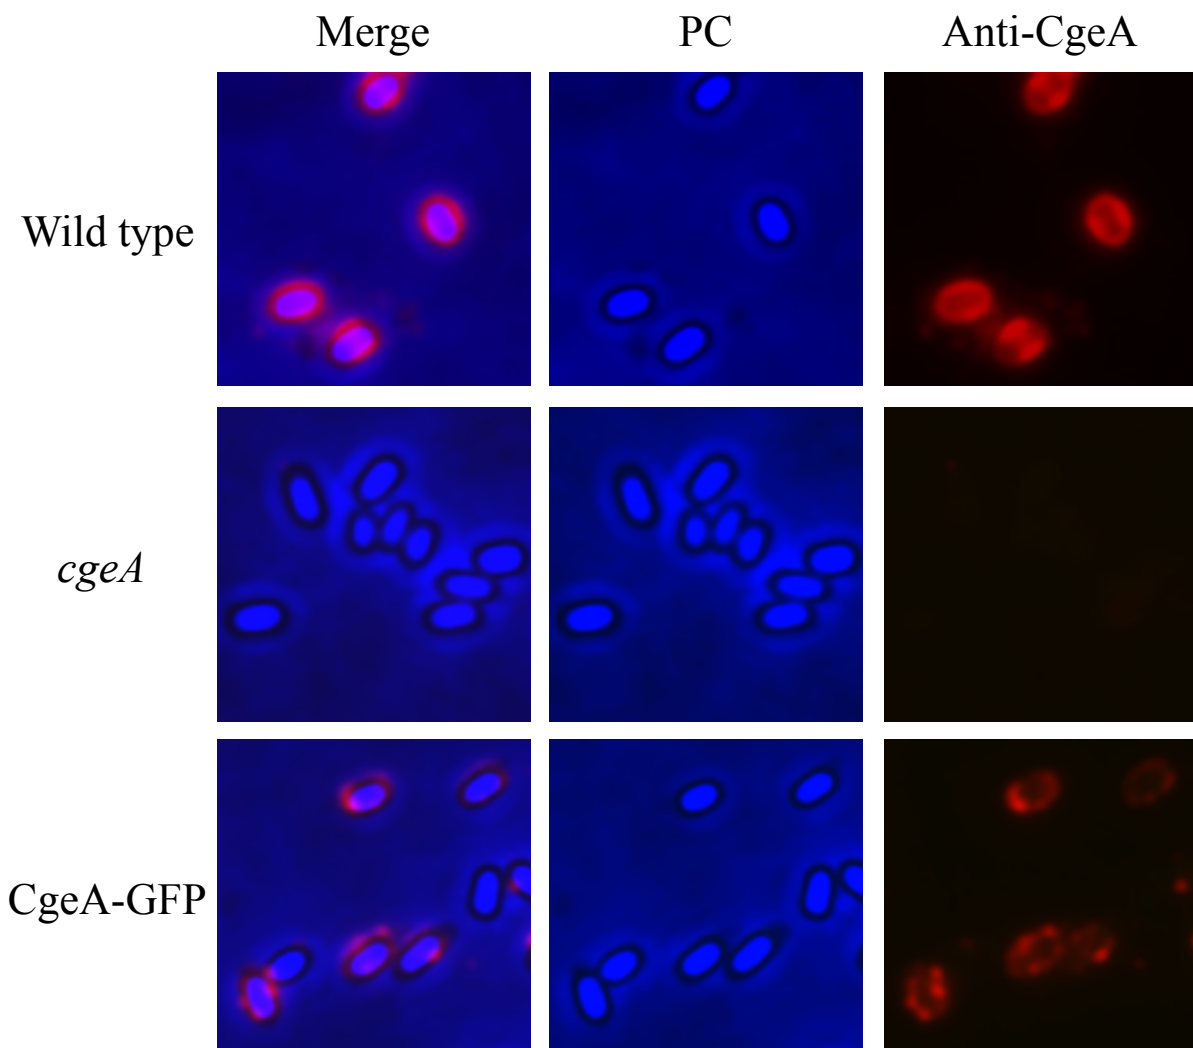

Fig. S2. Immunofluorescence microscopic analysis of *B. subtilis* spores using anti-CgeA antibodies. Strains 168 (upper panels), MTB945 (middle panels), and CGEA8G (lower panels) were induced to sporulate by nutrient exhaustion and subjected to immunofluorescence microscopy using anti-CgeA antibodies. Phase-contrast (PC), immunofluorescent (Anti-CgeA), and merged (Merge) images are shown. Phase-contrast and immunofluorescence images were captured using exposure times of 1 s and 0.2 s, respectively.

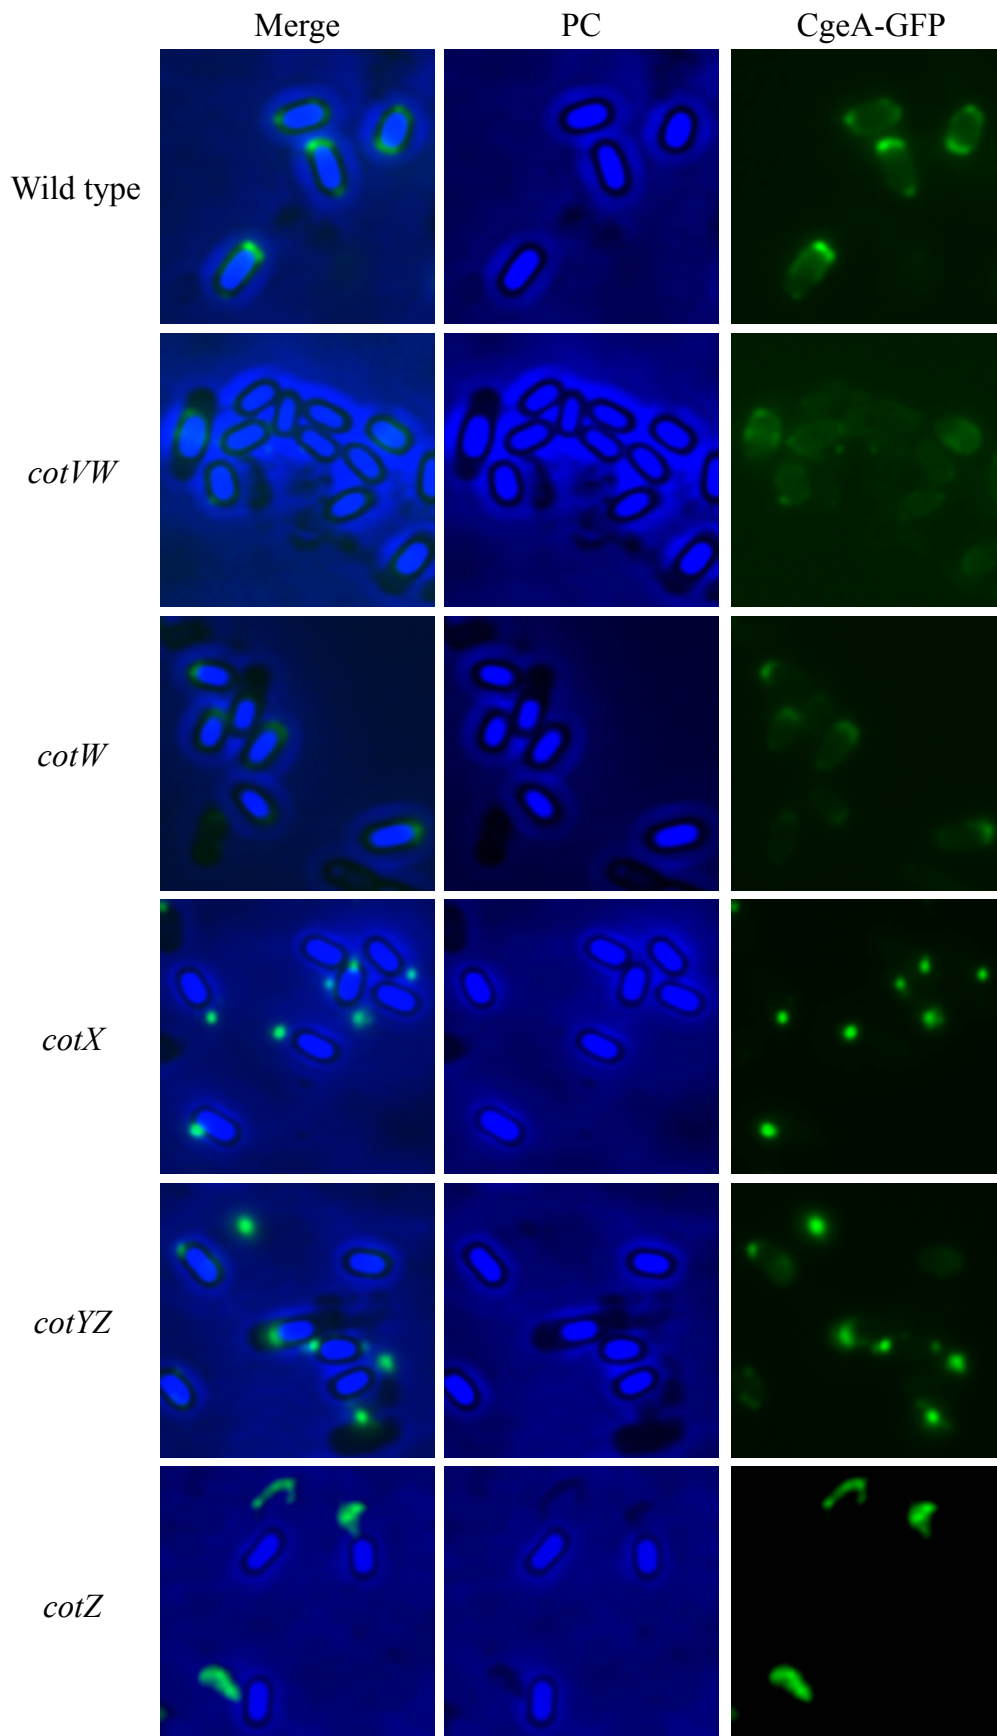

Fig. S3. Localization of CgeA-GFP in wild-type and mutant spores. Strains expressing *cgeA-gfp* and the indicated mutation were induced to sporulate by nutrient exhaustion. Phase-contrast (PC), GFP fluorescence (CgeA-GFP), and merged (Merge) images are shown.

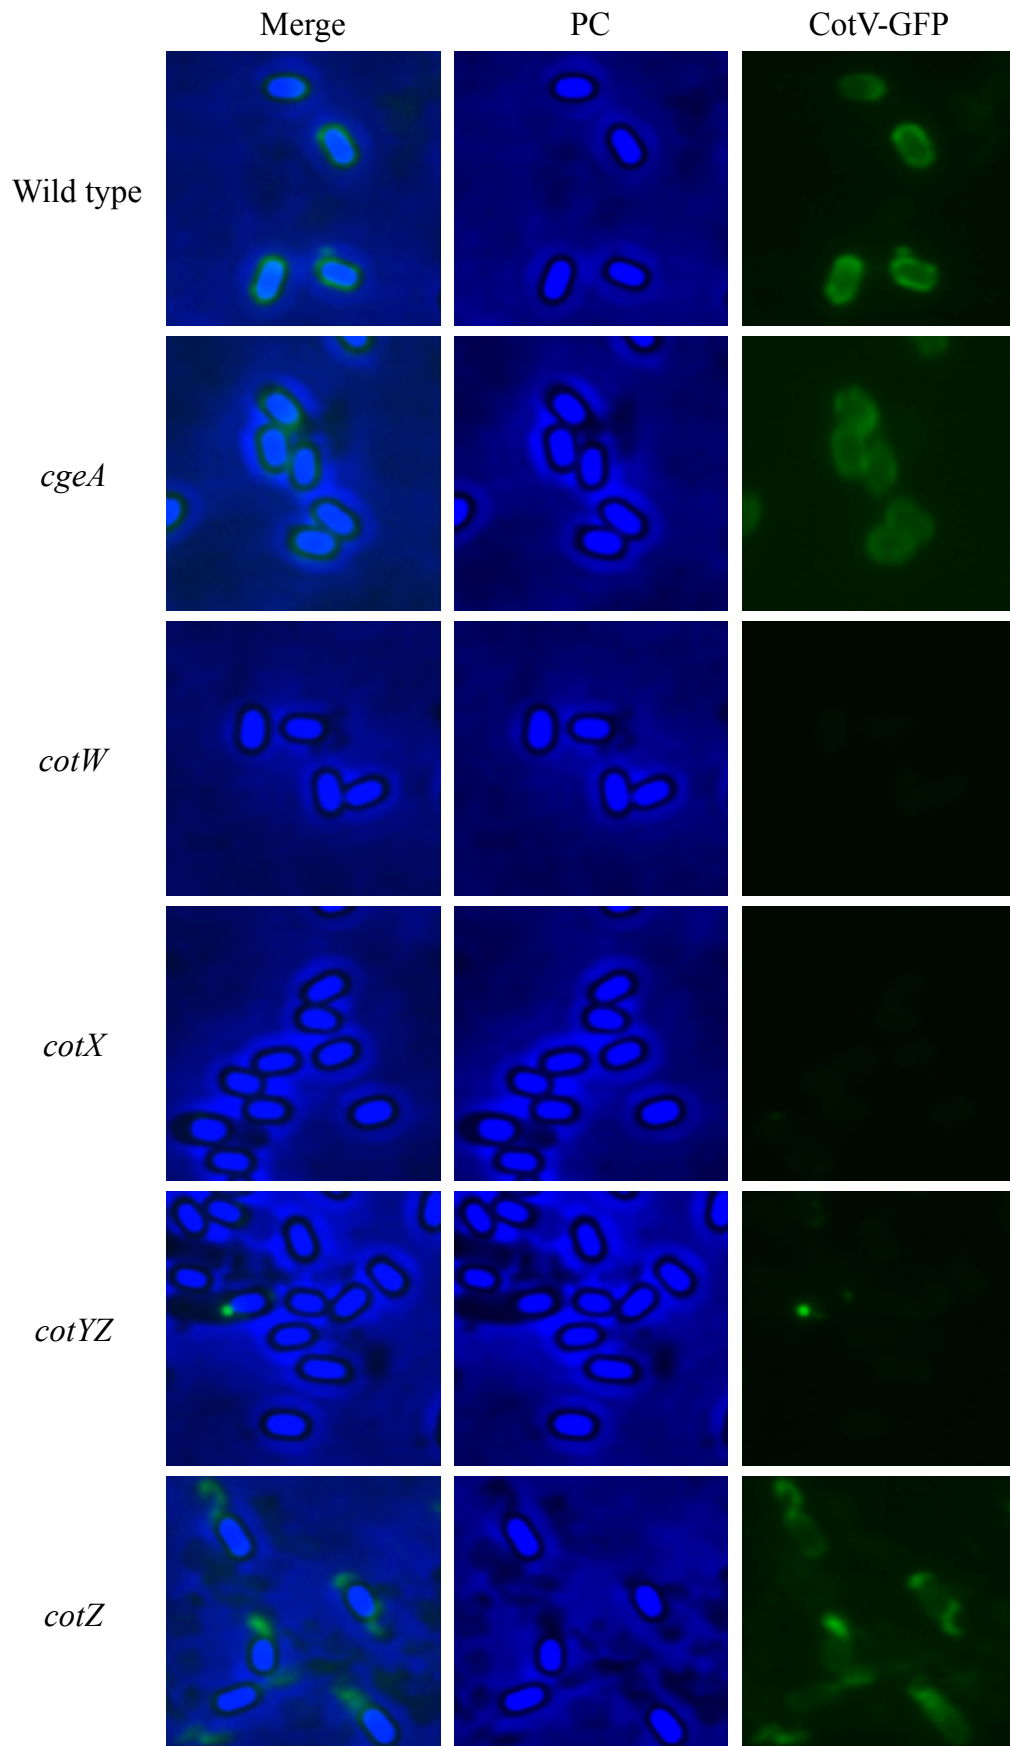

Fig. S4. Localization of CotV-GFP in wild-type and mutant spores. Strains expressing *cotV-gfp* and the indicated mutation were induced to sporulate by nutrient exhaustion. Phase-contrast (PC), GFP fluorescence (CotV-GFP), and merged (Merge) images are shown.

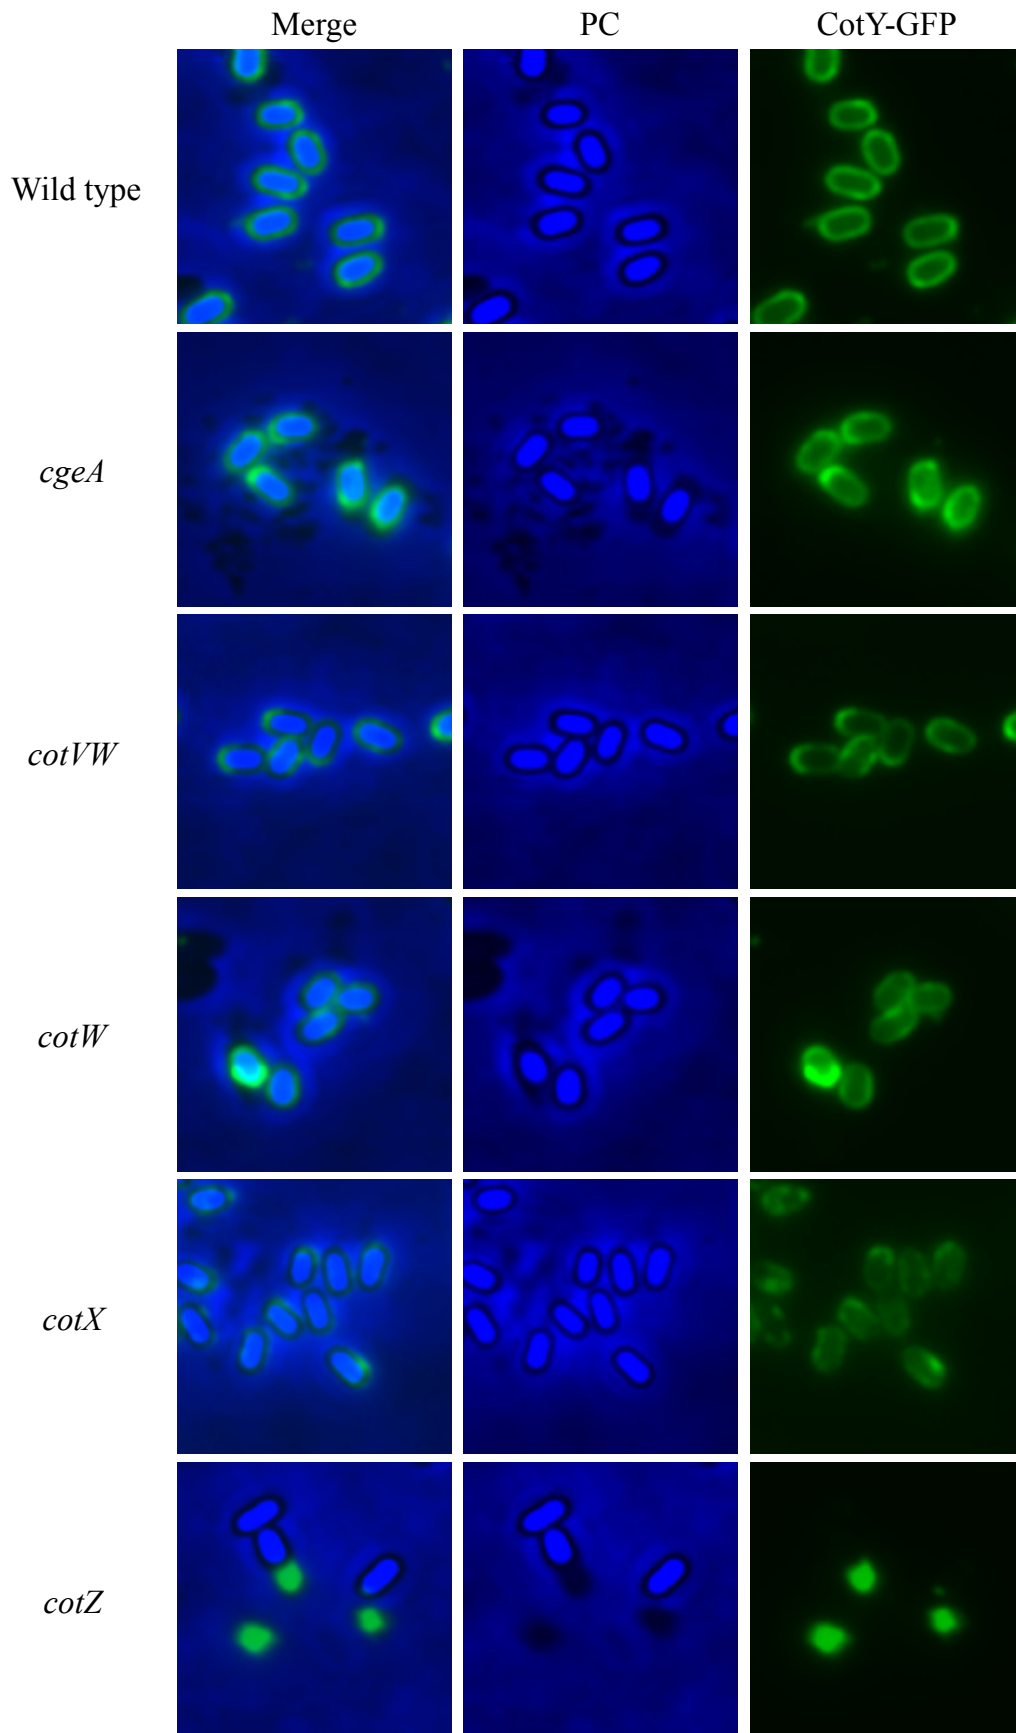

Fig. S5. Localization of CotY-GFP in wild-type and mutant spores. Strains expressing *cotY-gfp* and the indicated mutation were induced to sporulate by nutrient exhaustion. Phase-contrast (PC), GFP fluorescence (CotY-GFP), and merged (Merge) images are shown.

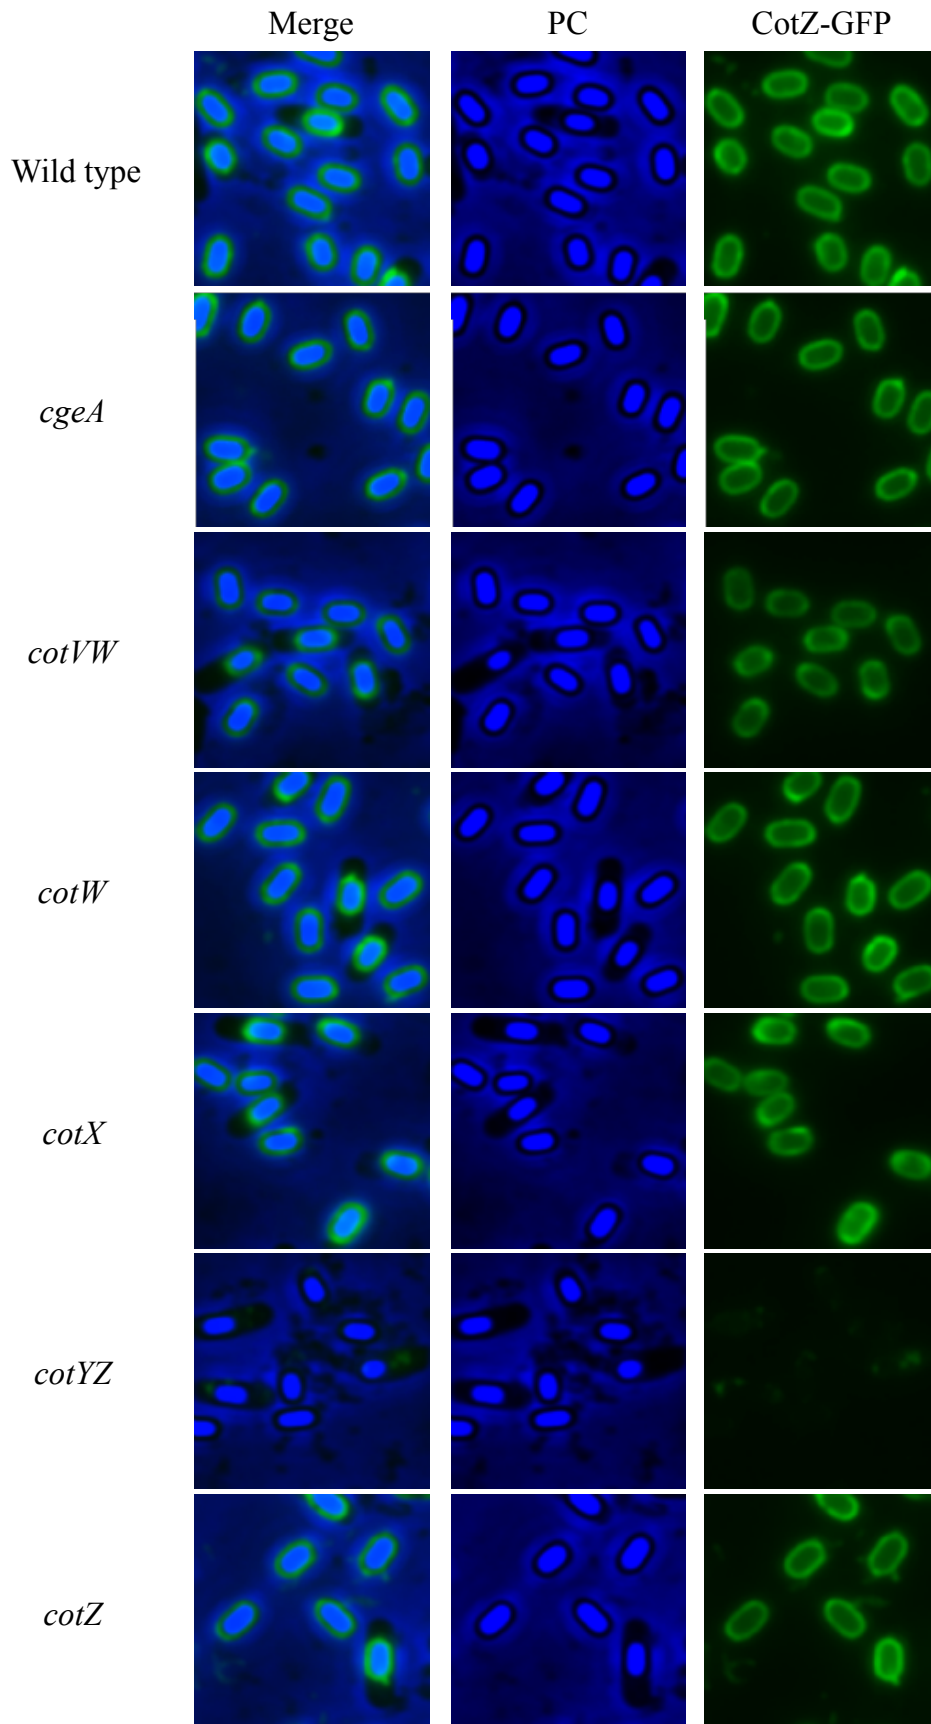

Fig. S6. Localization of CotZ-GFP in wild-type and mutant spores. Strains expressing *cotZ-gfp* and the indicated mutation were induced to sporulate by nutrient exhaustion. Phase-contrast (PC), GFP fluorescence (CotZ-GFP), and merged (Merge) images are shown.
